# Supplementary material
Source: Springer Nature journal article supplement (https://www.springermedizin.de/resource/supplementary/12916_2010_338_MOESM1_ESM.pdf/9599672)

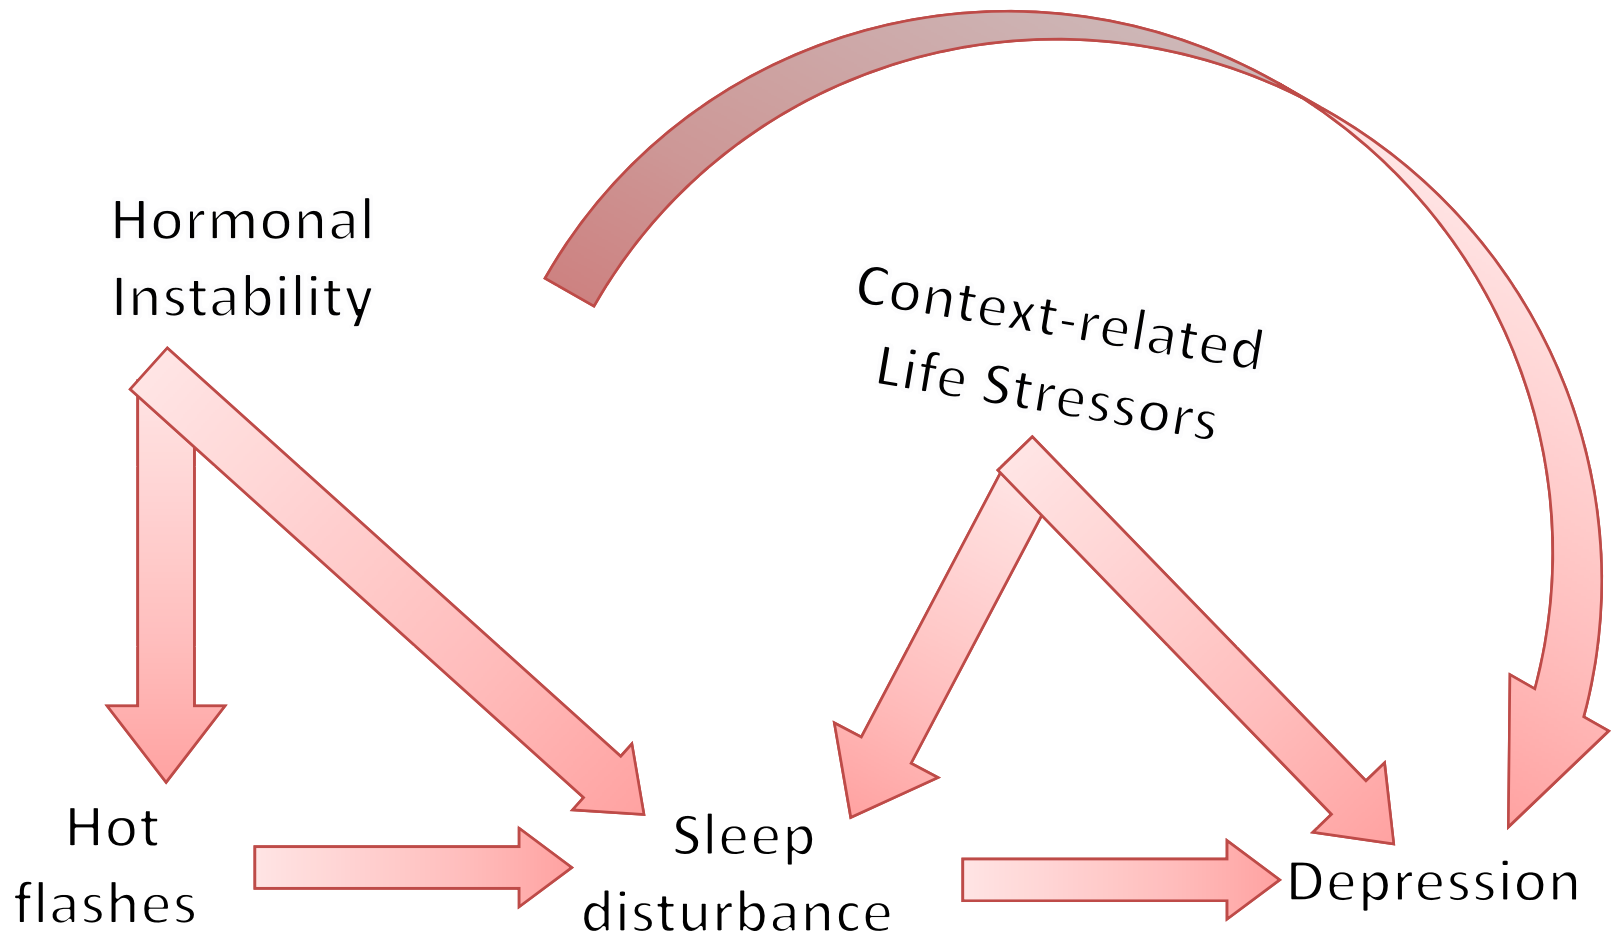

Supplement: MOESM1 [file 9599672]
